# Supplementary material for: Insights into the Australian mid-Holocene climate using downscaled climate models
Source: Copernicus journal article supplement (doi:10.5194/egusphere-2024-1211), 2024-05-08
Supplement: Supplementary file 1 [file egusphere-2024-1211-supplement.pdf]

**Supplement**

| USGS Category |                                              | Allen et al. (2020) BIOME |                                          |
|---------------|----------------------------------------------|---------------------------|------------------------------------------|
| Code          | Description                                  | Code                      | Description                              |
| Urb           | Urban and Built-up Land                      |                           |                                          |
| DryCp         | Dryland Cropland and Pasture                 |                           |                                          |
| IrrCp         | Irrigated Cropland and Pasture               |                           |                                          |
| MxCp          | Mixed Dryland/Irrigated Cropland and Pasture |                           |                                          |
| CpGr          | Cropland/Grassland Mosaic                    |                           |                                          |
| CpWd          | Cropland/Woodland Mosaic                     |                           |                                          |
| Gr            | Grassland                                    | St                        | Steppe                                   |
|               |                                              | TrG                       | Tropical Grassland                       |
| Sh            | Shrubland                                    | TeSh                      | Temperate Shrubland                      |
|               |                                              | TePk                      | Temperate Parkland                       |
| MxShGr        | Mixed Shrubland/Grassland                    | Se-des                    | Semi-desert                              |
| Sav           | Savannah                                     | WTeWo                     | Warm Temperate Woodland                  |
|               |                                              | Sav                       | Savannah                                 |
|               |                                              | TrRF                      | Tropical Raingreen Forest                |
| BLDF          | Deciduous Broadleaf Forest                   | BSBF                      | Boreal Summergreen Broad-leaved Forest   |
|               |                                              | TeSF                      | Temperate Summergreen Forest             |
| NLDF          | Deciduous Needleleaf Forest                  | BSNF                      | Boreal Summergreen Needle-leaved Forest  |
| BLEvF         | Evergreen Broadleaf Forest                   | TeBEF                     | Temperate Broad-leaved Evergreen Forest  |
|               |                                              | TrEF                      | Tropical Evergreen Forest                |
| NLEvF         | Evergreen Needleleaf Forest                  | BENF                      | Boreal Evergreen Needle-leaved Forest    |
|               |                                              | TeNEF                     | Temperate Needle-leaved Evergreen Forest |
| MxF           | Mixed Forest                                 | TeMxF                     | Temperate Mixed Forest                   |
|               |                                              | BPk                       | Boreal Parkland                          |
| Wat           | Water Bodies                                 | OL                        | Ocean or Lake                            |
| HWet          | Herbaceous Wetland                           |                           |                                          |
| WdWet         | Wooden Wetland                               |                           |                                          |
| Bar           | Barren or Sparsely Vegetated                 | Des                       | Desert                                   |
| HTun          | Herbaceous Tundra                            |                           |                                          |
| WdTun         | Wooded Tundra                                | BWo                       | Boreal Woodland                          |
| MxTun         | Mixed Tundra                                 | ShT                       | Shrub Tundra                             |
| BGTun         | Bare Ground Tundra                           | Tun                       | Tundra                                   |
| SnIc          | Snow or Ice                                  | ICE                       | Ice Sheet                                |
| Lake          | Lakes                                        | OL                        | Ocean or Lake                            |

**Table S1: Vegetation mapping between the USGS classification used in WRF to the BIOME classification used in Allen et al. (2020).**

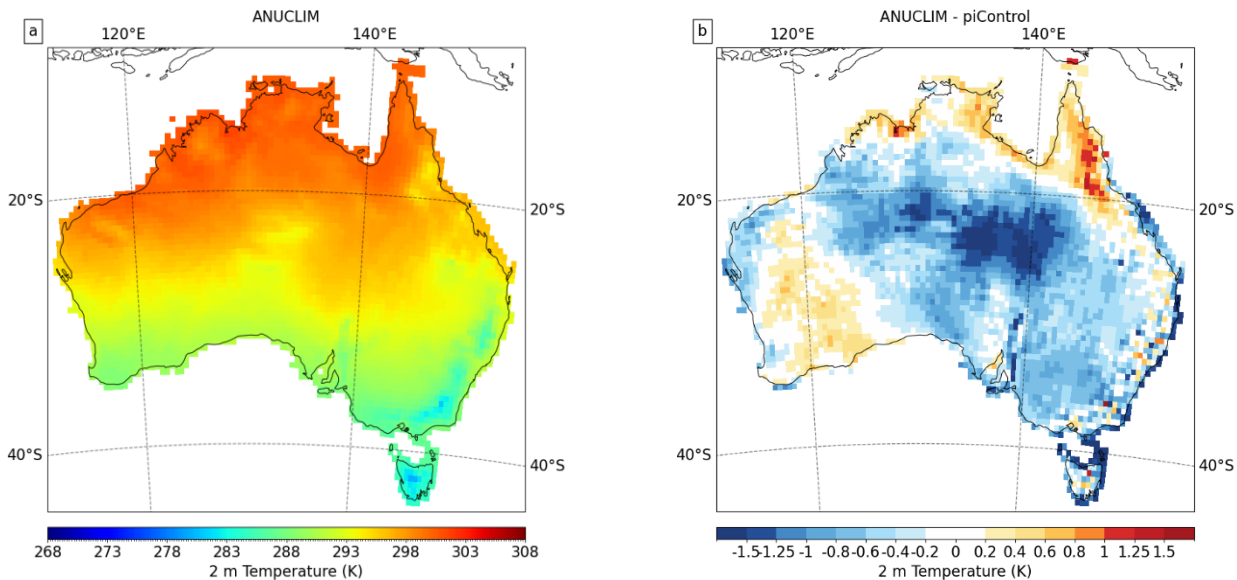

635 **Figure S1: MAP from the ANUCLIM dataset (Xu and Hutchinson, 2011) for 1970–1999 (a) and the difference between ANUCLIM and the WRF pre-industrial simulation (b).**

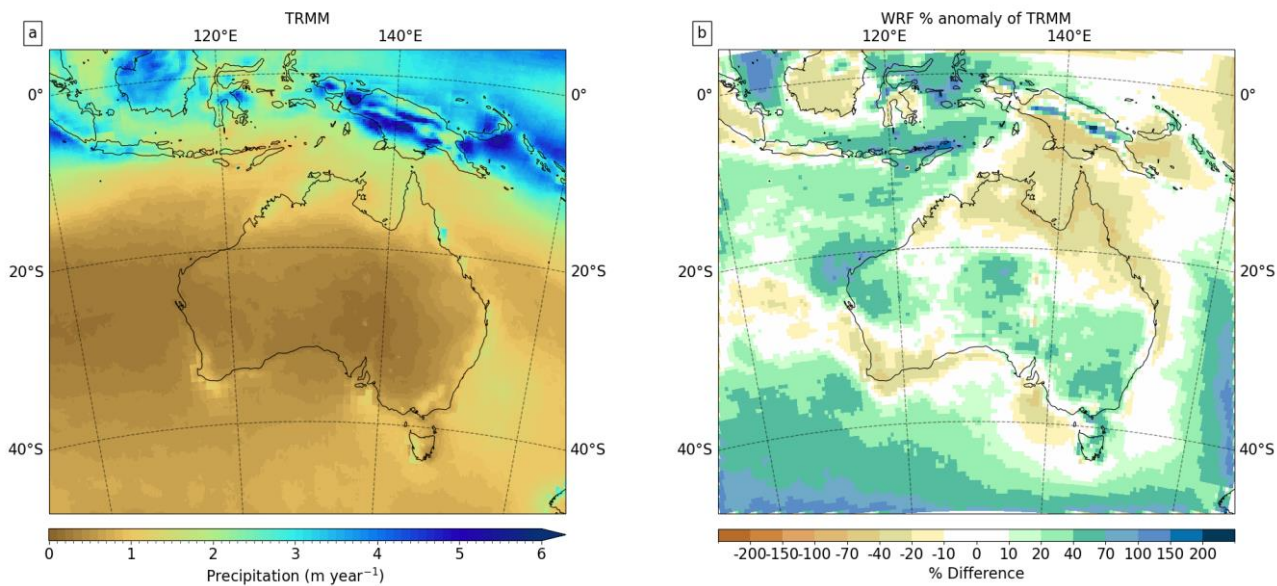

**Figure S2: MAP from the Tropical Rainfall Monitoring Misson (TRMM) for 1998–2019 (a) and the difference between the WRF pre-industrial simulation and TRMM given as a percentage of TRMM precipitation (b).**

640

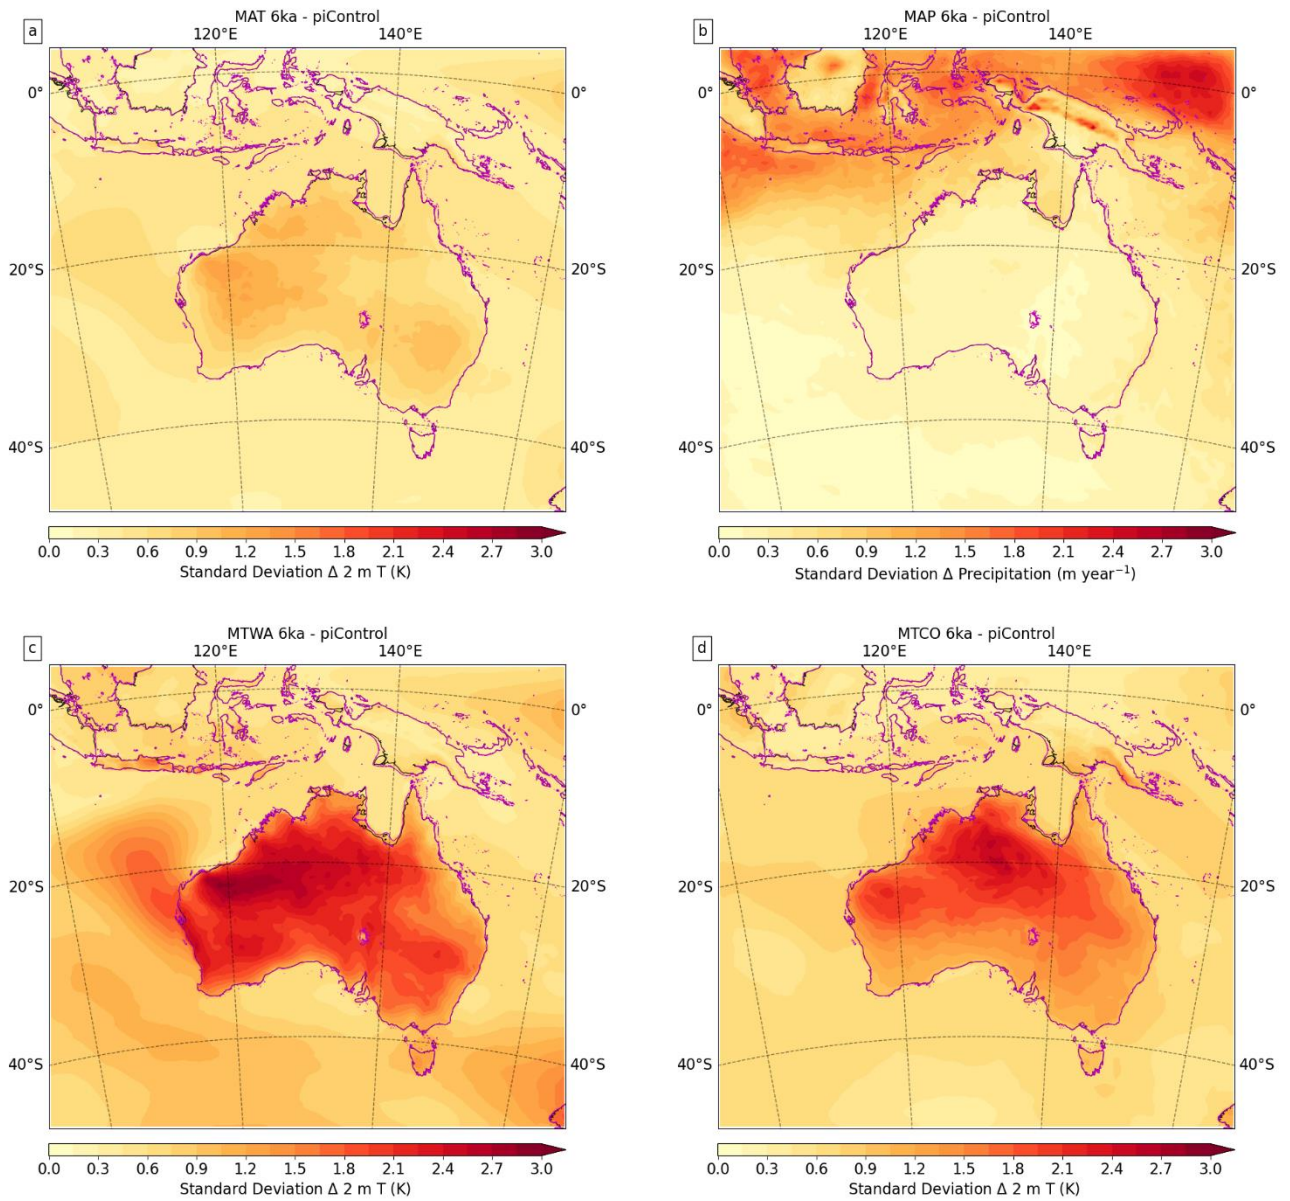

**Figure S3: The inter-year spread (given as the standard deviation) from the WRF simulations in MAT (a), MAP (b), MTWA (c), and MTCO (d). The purple line is the coastline in the mid-Holocene.**

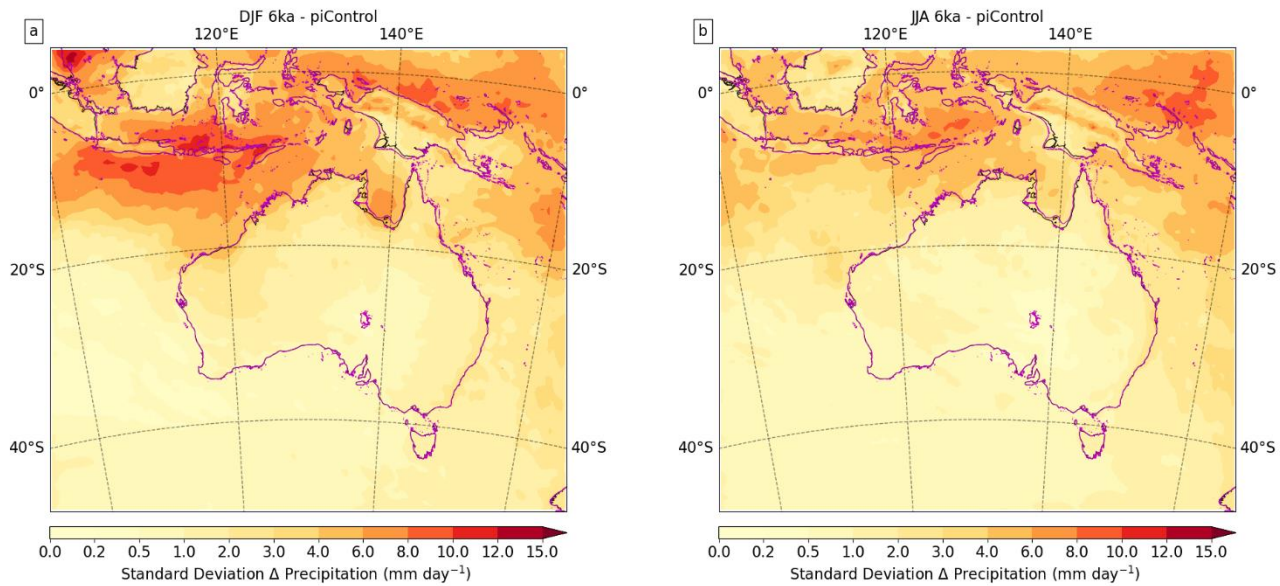

**Figure S4:** The standard deviation from the WRF simulations of precipitation for Dec, Jan, and Feb (a), and Jun, Jul, and Aug (b). The purple line is the coastline in the mid-Holocene. Note the different units from MAP in Fig. S3b.

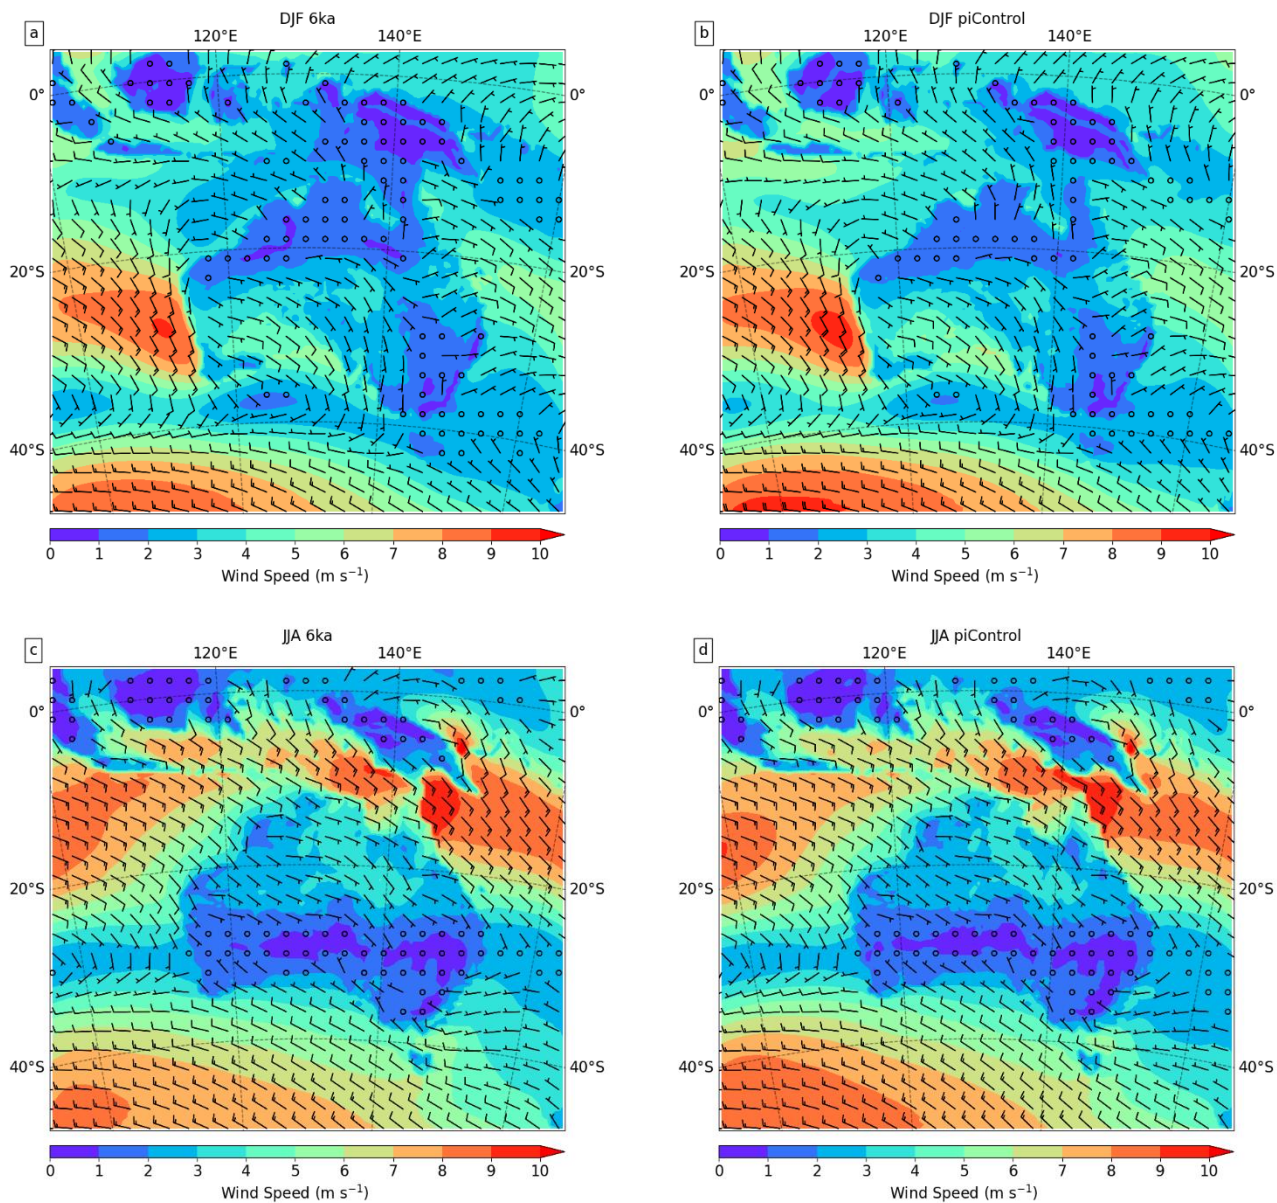

**Figure S5: Seasonal 10 m wind for Dec, Jan, and Feb mid-Holocene (a), Dec, Jan, and Feb pre-industrial (b), Jun, Jul, and Aug mid-Holocene (c), and Jun, Jul, and Aug pre-industrial (d).**

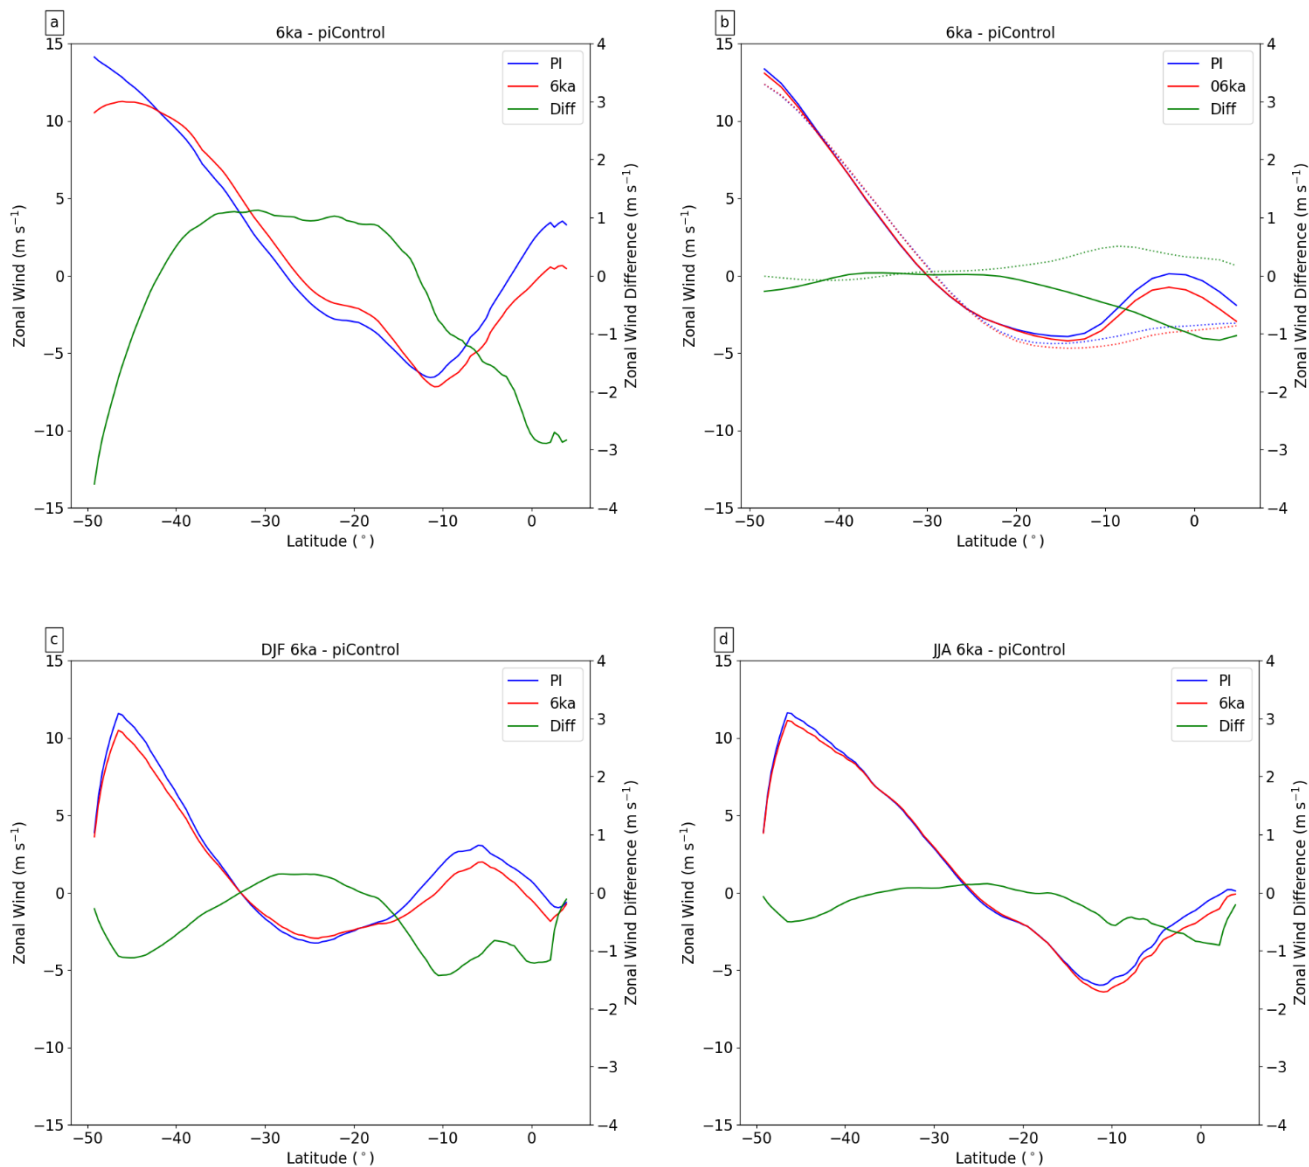

655

**Figure S6: 850 hPa zonal wind for the pre-industrial and mid-Holocene. The annual mean from the WRF simulation (a). The annual mean from the CESM simulation, the solid lines are the Australian domain (100°E–170°E) and the dotted lines are the global values (b). The Dec, Jan, and Feb mean from the WRF simulation (c). The Jun, Jul, and Aug mean from the WRF simulation (d).**

## References

660 Allen, J. R. M., Forrest, M., Hickler, T., Singarayer, J. S., Valdes, P. J., and Huntley, B.: Global vegetation patterns of the past 140,000 years, *J. Biogeogr.*, 47, 2073–2090, <https://doi.org/10.1111/jbi.13930>, 2020.
